# Supplementary material for: Screening of spider mites (Acari: Tetranychidae) for reproductive endosymbionts reveals links between co-infection and evolutionary history
Source: PubMed Central journal article supplement (PMC4904281; doi:10.1038/srep27900), 2016-06-13
Supplement: srep27900-s1.pdf [file srep27900-s1.pdf]

**Screening of spider mites (Acari: Tetranychidae) for reproductive endosymbionts reveals links  
between co-infection and evolutionary history**

Yan-Kai Zhang<sup>1,2</sup>, Ya-Ting Chen<sup>2</sup>, Kun Yang<sup>2</sup>, Ge-Xia Qiao<sup>1\*</sup> & Xiao-Yue Hong<sup>2\*</sup>

<sup>1</sup>Institute of Zoology, Chinese Academy of Sciences, Beijing, 100101, China.

<sup>2</sup>Department of Entomology, Nanjing Agricultural University, Nanjing, Jiangsu 210095, China

\*Corresponding author.

Ge-Xia Qiao

Institute of Zoology

Chinese Academy of Sciences

Beijing, 100101

China

Tel / Fax: 0086-10-64807133 / 0086-10-64807099

E-mail address: [qiaogx@ioz.ac.cn](mailto:qiaogx@ioz.ac.cn)

Xiao-Yue Hong

Department of Entomology

Nanjing Agricultural University

Nanjing, Jiangsu 210095

CHINA

Tel & Fax: 0086-25-84395339

E-mail address: [xyhong@njau.edu.cn](mailto:xyhong@njau.edu.cn)

**Table S1.** Primers used in this study

| Organism                  | Gene                           | Product                                           | Primer (5'-3')                      | Annealing temperature | Reference |
|---------------------------|--------------------------------|---------------------------------------------------|-------------------------------------|-----------------------|-----------|
| <i>Wolbachia pipiens</i>  | <i>wsp</i>                     | Outer surface protein                             | wspF1-GTCCAATARSTGATGARGAAAC        | 55°C                  | 61        |
|                           |                                |                                                   | wspR1-CYGCACCAAYAGYRCTRATAA         |                       |           |
|                           | <i>gatB</i>                    | Glutamyl-tRNA(Gln)<br>amidotransferase, subunit B | gatBF-GAKTTAAAYCGYGCAGGBGTT         | 54°C                  | 61        |
|                           |                                |                                                   | gatBR-TGGYAAAYTCRGGYAAAGATGA        |                       |           |
|                           | <i>coxA</i>                    | Cytochromecoxidase, subunit I                     | coxAF-TTGGRGCRATYAACTTTATAG         | 55°C                  | 61        |
|                           |                                |                                                   | coxAR-CTAAAGACTTTKACRCCAGT          |                       |           |
|                           | <i>hcpA</i>                    | Conserved hypothetical protein                    | hcpAF-GAAATARCAGTTGCTGCAAA          | 53°C                  | 61        |
| hcpAR-GAAAGTYRAGCAAGYTCTG |                                |                                                   |                                     |                       |           |
| <i>ftsZ</i>               | Cell division protein          | ftsZF-ATYATGGARCATATAAARGATAG                     | 54°C                                | 61                    |           |
|                           |                                | ftsZR-TCRAGYAATGGATTRGATAT                        |                                     |                       |           |
| <i>fbpA</i>               | Fructose-bisphosphate aldolase | fbpAF-GCTGCTCCRCTTGGYWTGAT                        | 59°C                                | 61                    |           |
|                           |                                | fbpAR-CCRCCAGARAAAAYYACTATTC                      |                                     |                       |           |
| <i>Cardinium hertigii</i> | <i>16S rRNA</i>                | 16S ribosomal RNA                                 | Ch-F-TACTGTAAGAATAAGCACCGGC         | 57°C                  | 24        |
|                           |                                |                                                   | Ch-R-GTGGATCACTTAACGCTTTTCG         |                       |           |
|                           | <i>gyrB</i>                    | Gyrase B subunit                                  | gyrB1F-CAAAGAYACCTATAARAT TTCTG     | 52°C                  | 25        |
|                           |                                |                                                   | gyrB1R-GTAACGTTGTACARAKACRGCAT      |                       |           |
| <i>Spiroplasma sp.</i>    | <i>16S rRNA</i>                | 16S ribosomal RNA                                 | SpitsJ04-GCCAGAAGTCAGTGTCTAACCG     | 56°C                  | 47        |
|                           |                                |                                                   | SpitsN55-ATTCCAAGGCATCCACCATACG     |                       |           |
|                           | <i>rpoB</i>                    | RNA Polymerase B                                  | rpoBF3-GGNTTTATTGAAACACCATAYCGTC    | 55°C                  | 62        |
|                           |                                |                                                   | rpoBR2-GCATGTAATTTATCATCAACCATGTGTG |                       |           |
| <i>Rickettsia sp.</i>     | <i>gltA</i>                    | Citrate synthase                                  | RICS741F-CATCCGGAGCTAATGGTTTTGC     | 56°C                  | 63        |
|                           |                                |                                                   | RCIT1197R-CATTTCTTTCCATTGTGCCATC    |                       |           |

|             |                 |                               |                                                                    |      |    |
|-------------|-----------------|-------------------------------|--------------------------------------------------------------------|------|----|
| Spider mite | <i>COI</i>      | Cytochromecoxidase, subunit I | COIF-TGATTTTTTGGTCACCCAGAAG<br>COIR-TACAGCTCCTATAGATAAAAC          | 52°C | 53 |
|             | <i>18S rRNA</i> | 18S ribosomal RNA             | 18S1F-ACCGCGAATGGCTCATTAAATCAGTT<br>18S10R-ACAAAGGGCAGGGACGTAATCAA | 56°C | 64 |
|             | <i>28S rRNA</i> | 28S ribosomal RNA             | 28v5'-AAGGTAGCCAAATGCCTCATC<br>28jj3'-AGTAGGGTAAACTAACCT           | 52°C | 64 |

---
